# Supplementary material
Source: Royal Society of Chemistry journal article supplement (doi:10.1039/d6dt01055e)
Supplement: d6dt01055e1.pdf [file d6dt01055e1.pdf]

## Supporting Information

# Enhancing the potential of $\text{Cs}_{0.1}\text{MA}_{0.9}\text{PbI}_3$ perovskite layer through the suspension of pure and vanadium-doped metal sulphides for solar cells

Dhanasekaran Vikraman<sup>a</sup>, Hailiang Liu<sup>b</sup>, Sajjad Hussain<sup>c,d</sup>, K. Karuppasamy<sup>e,f</sup>, Jungwon Kang<sup>b</sup>, Jongwan Jung<sup>c,d</sup>, Akram Alfantazi<sup>e,f</sup>, Hyun-Seok Kim<sup>a\*</sup>

<sup>a</sup>Division of Electronics and Electrical Engineering, Dongguk University-Seoul, Seoul 04620, Republic of Korea.

<sup>b</sup>Convergence Semiconductor Research Center, Department of Electronics and Electrical Engineering, Dankook University, Yongin 16890, Republic of Korea.

<sup>c</sup>Hybrid Materials Center (HMC), Sejong University, Seoul 05006, Republic of Korea.

<sup>d</sup>Department of Nanotechnology and Advanced Materials Engineering, Sejong University, Seoul 05006, Republic of Korea.

<sup>e</sup>Emirates Nuclear Technology Center (ENTC), Khalifa University of Science and Technology, Abu Dhabi 127788, UAE

<sup>f</sup>Department of Chemical and Petroleum Engineering, Khalifa University of Science and Technology, Abu Dhabi 127788, UAE

\* Corresponding author's email: [hyunseokk@dongguk.edu](mailto:hyunseokk@dongguk.edu)

## ***S1. Characterization***

The electronic configuration of nanostructures was characterized by Raman spectroscopy (Renishaw inVia RE04). Energy dispersive analysis combined JEOL JSM-6700F field emission scanning electron microscopy was used to analyze the morphological and compositional properties of synthesized hybrid nanostructures. X-ray photoelectron spectroscopy analysis was performed using PHI 5000 Versa Probe equipped with a monochromatic Al K $\alpha$  radiation source (25W,  $6.7 \times 10^{-8}$  Pa). **The surface topography of prepared active layers was measured using atomic force microscopy (Park Systems XE-150) operating in non-contact mode with  $3 \mu\text{m} \times 3 \mu\text{m}$  scan size.** UV-vis optical spectroscopy (Optizen 2120UV) was used to measure the absorption spectra of active layer. The current density-voltage (J-V) characteristics were measured in an electrometer (Keithley 6571B) with a solar simulator (San Ei Elec. XES 40S2-CE) using an AM 1.5G-filtered Xe lamp exposure with an intensity of  $100 \text{ mW}/\text{cm}^2$ . Electrochemical impedance spectroscopy measurements were carried out using a PMC-1000 PARSTAT potentiostat under dark conditions at room temperature by applying 0 V bias voltage over a frequency range from 1 MHz to 1 Hz.

**The stability of the perovskite solar cells was evaluated under ambient conditions at room temperature. The devices were unencapsulated and exposed to air with a relative humidity of approximately 35%. The stability measurements were carried out under continuous illumination ( $100 \text{ mW} \cdot \text{cm}^{-2}$ ). The photovoltaic parameters were periodically measured over a total duration of 1000 hours, and the normalized PCE was tracked to assess device degradation. In addition, thermal stability tests were performed by storing the unencapsulated devices at  $70^\circ\text{C}$  in ambient air. The device performance was monitored at regular intervals to evaluate thermal-induced degradation. Multiple devices were measured to ensure reproducibility of the observed trends.**

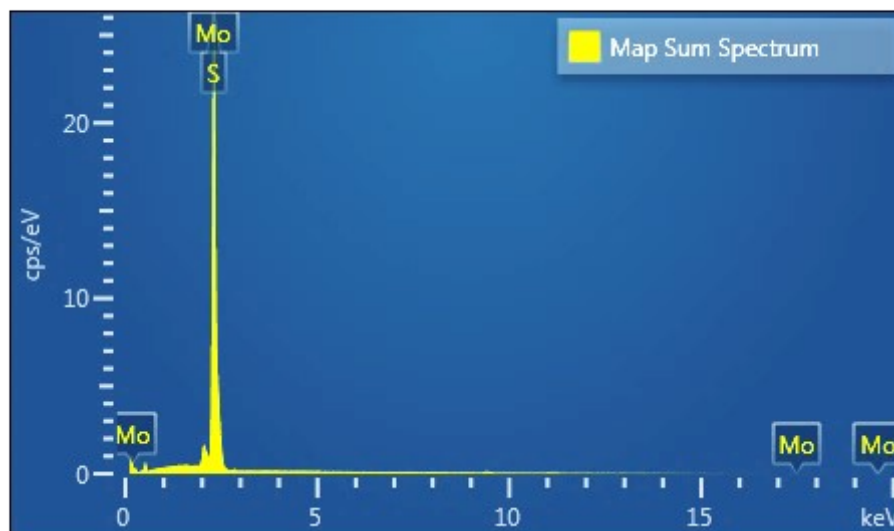

**Figure S1.** EDS profile of MoS<sub>2</sub>.

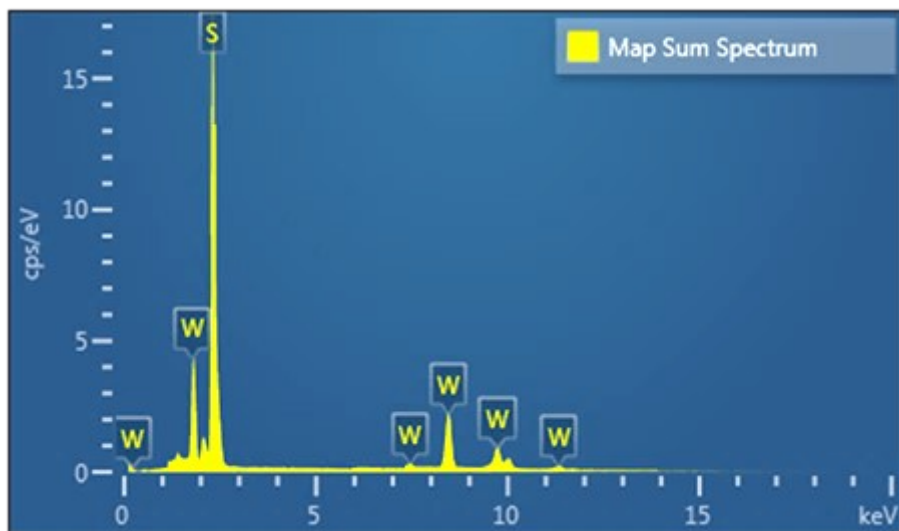

**Figure S2.** EDS profile of WS<sub>2</sub>.

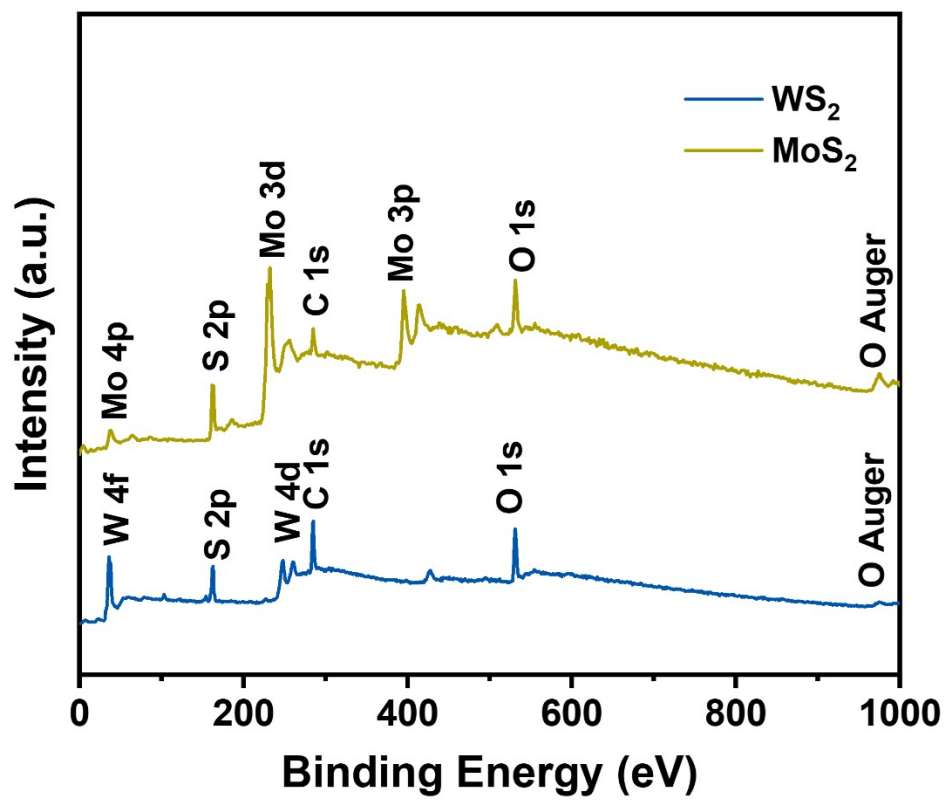

Figure S3. XPS survey profiles MoS<sub>2</sub> and WS<sub>2</sub>.

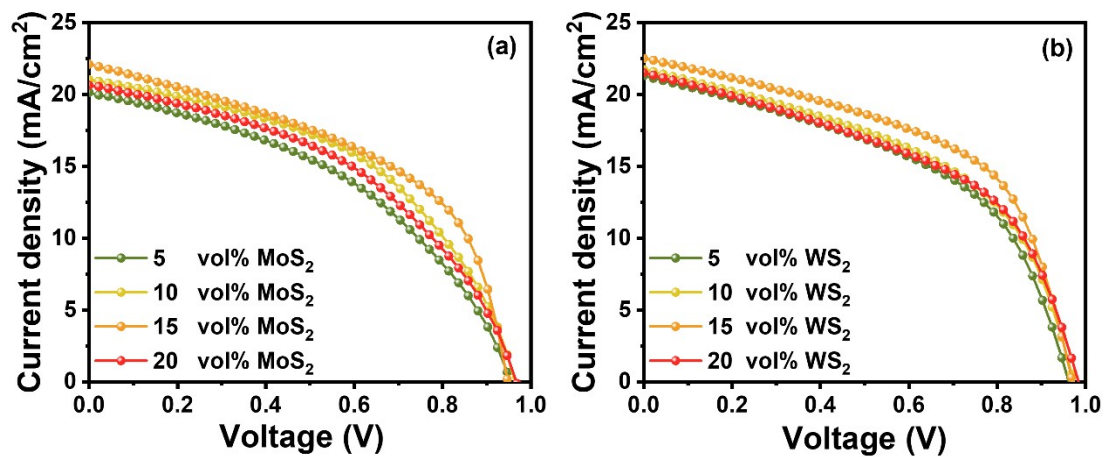

**Figure S4.**  $J$ - $V$  characteristics of different amounts of (a) MoS<sub>2</sub> and (b) WS<sub>2</sub> using modulated Cs<sub>0.1</sub>MA<sub>0.9</sub>PbI<sub>3</sub> active layer in PSCs.

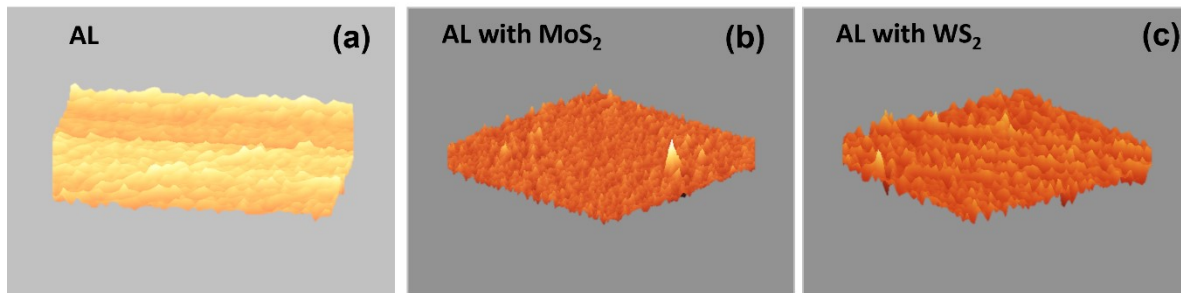

**Figure S5.** AFM images of (a) pure and (b) MoS<sub>2</sub>, (c) WS<sub>2</sub>-blended (15 vol.%) Cs<sub>0.1</sub>MA<sub>0.9</sub>PbI<sub>3</sub> perovskite layer.

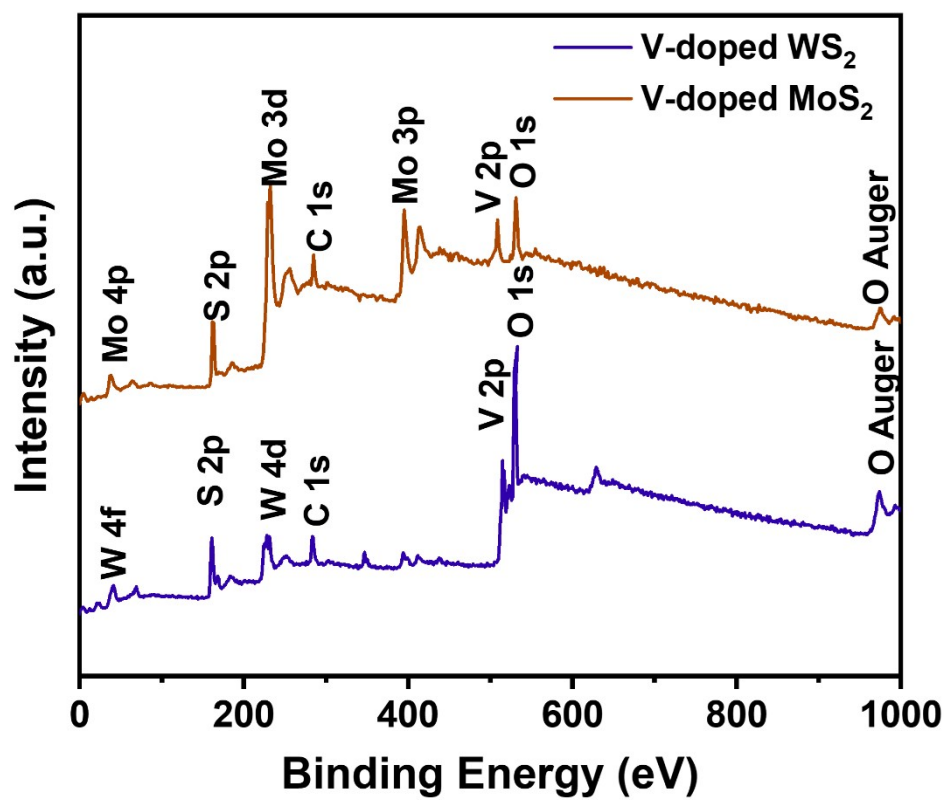

Figure S6. XPS survey profiles M2 and W2.

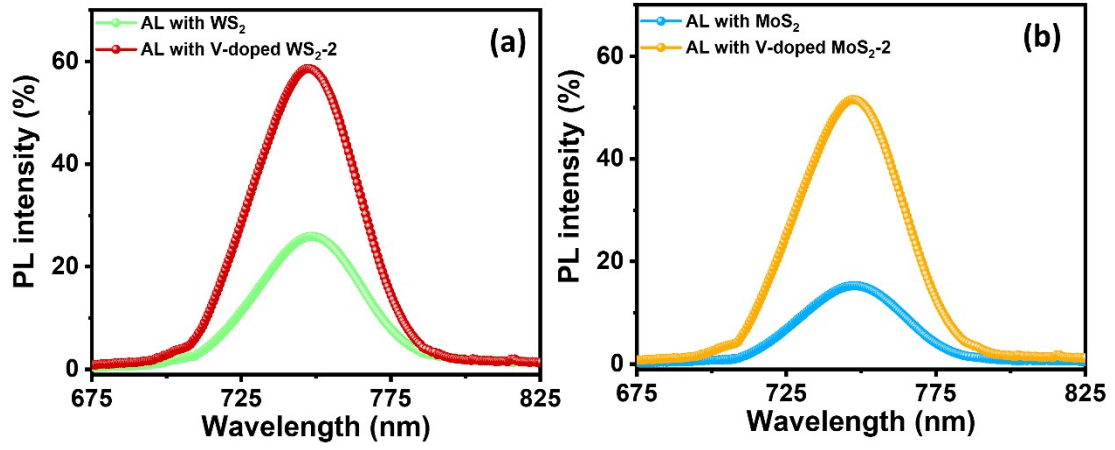

**Figure S7.** PL variations for the 15 vol% of (a) pure and W2 V-doped  $WS_2$  suspended active layer; (b) pure and M2 V-doped  $MoS_2$  suspended perovskite layer.

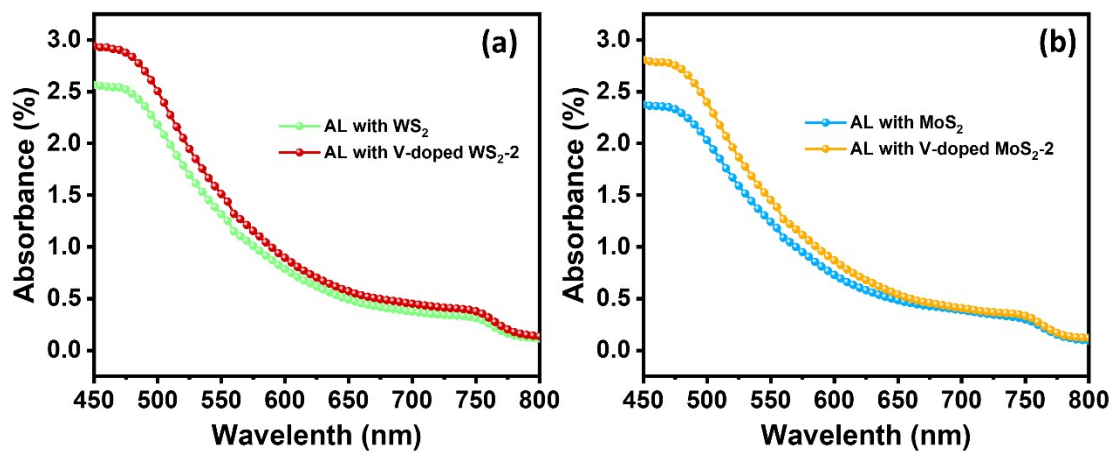

**Figure S8.** Absorption profile variations for the 15 vol% of (a) pure and W2 V-doped WS<sub>2</sub> suspended active layer; (b) pure and M2 V-doped MoS<sub>2</sub> suspended perovskite layer.

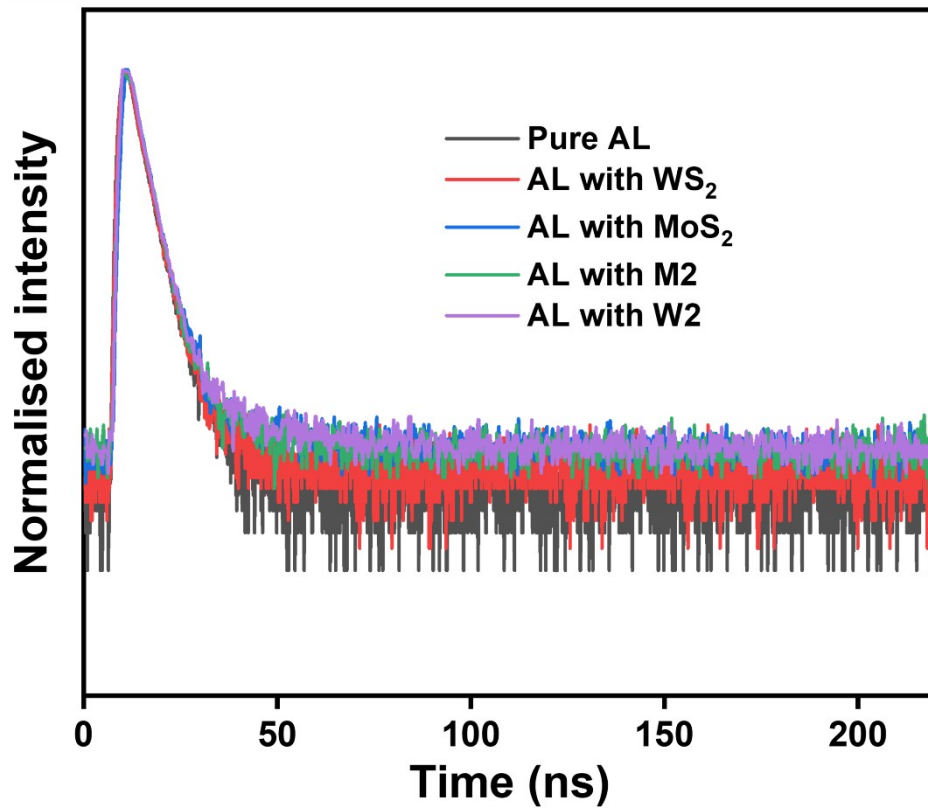

**Figure S9.** TRPL variations for the pure and 15 vol% of MoS<sub>2</sub>, WS<sub>2</sub>, M2 and W2 suspended perovskite layer.

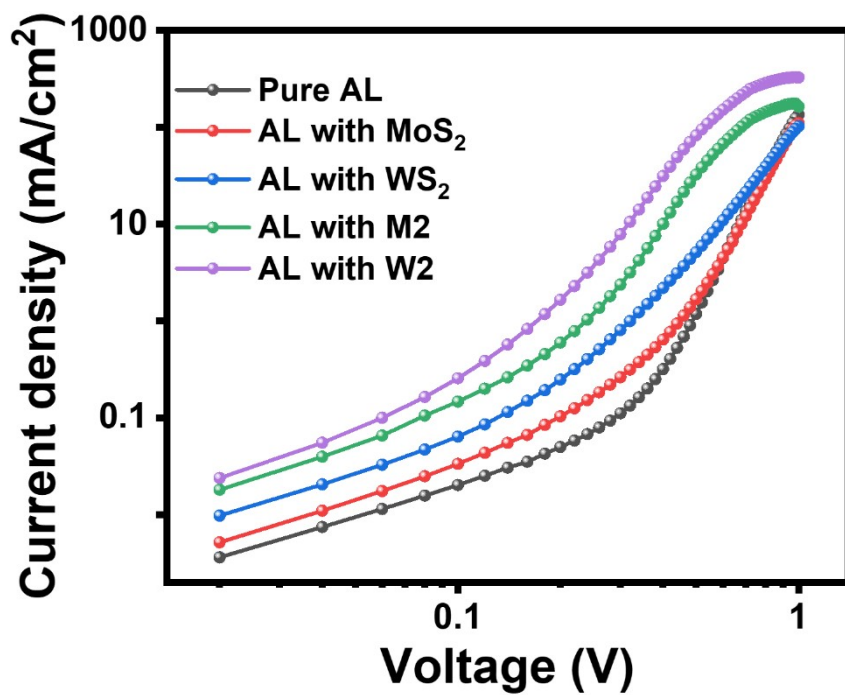

**Figure S10.** Log J-V variations for the pure and 15 vol% of MoS<sub>2</sub>, WS<sub>2</sub>, M2 and W2 suspended perovskite layer.

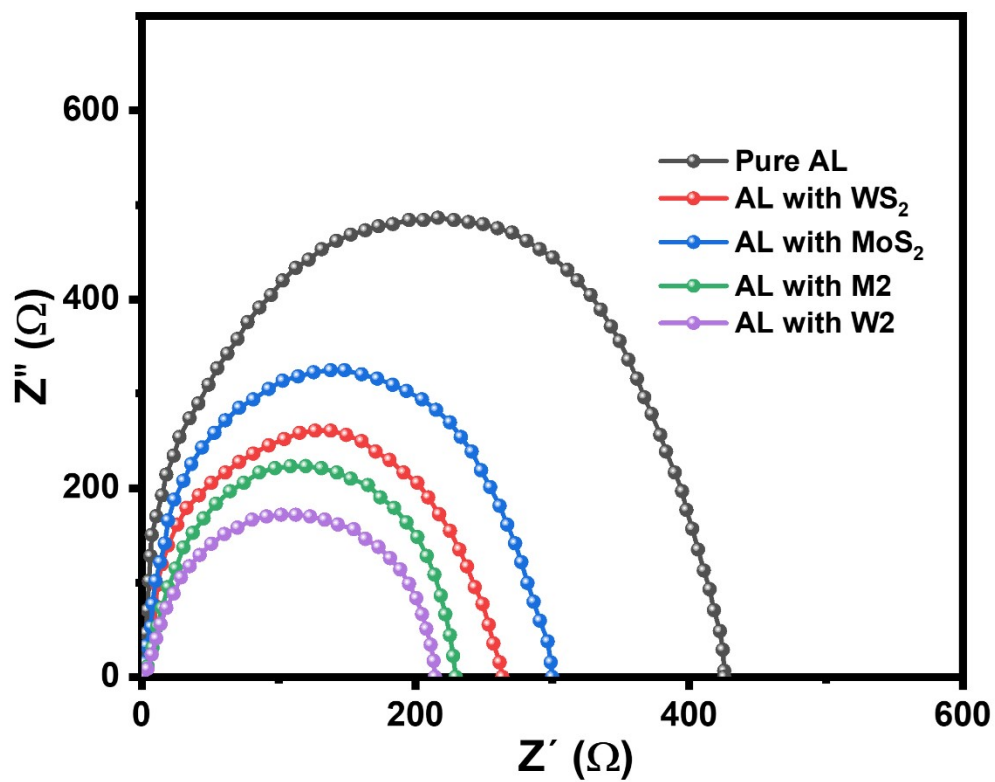

**Figure S11.** EIS profiles for the pure and 15 vol% of  $MoS_2$ ,  $WS_2$ , M2 and W2 suspended perovskite layer.

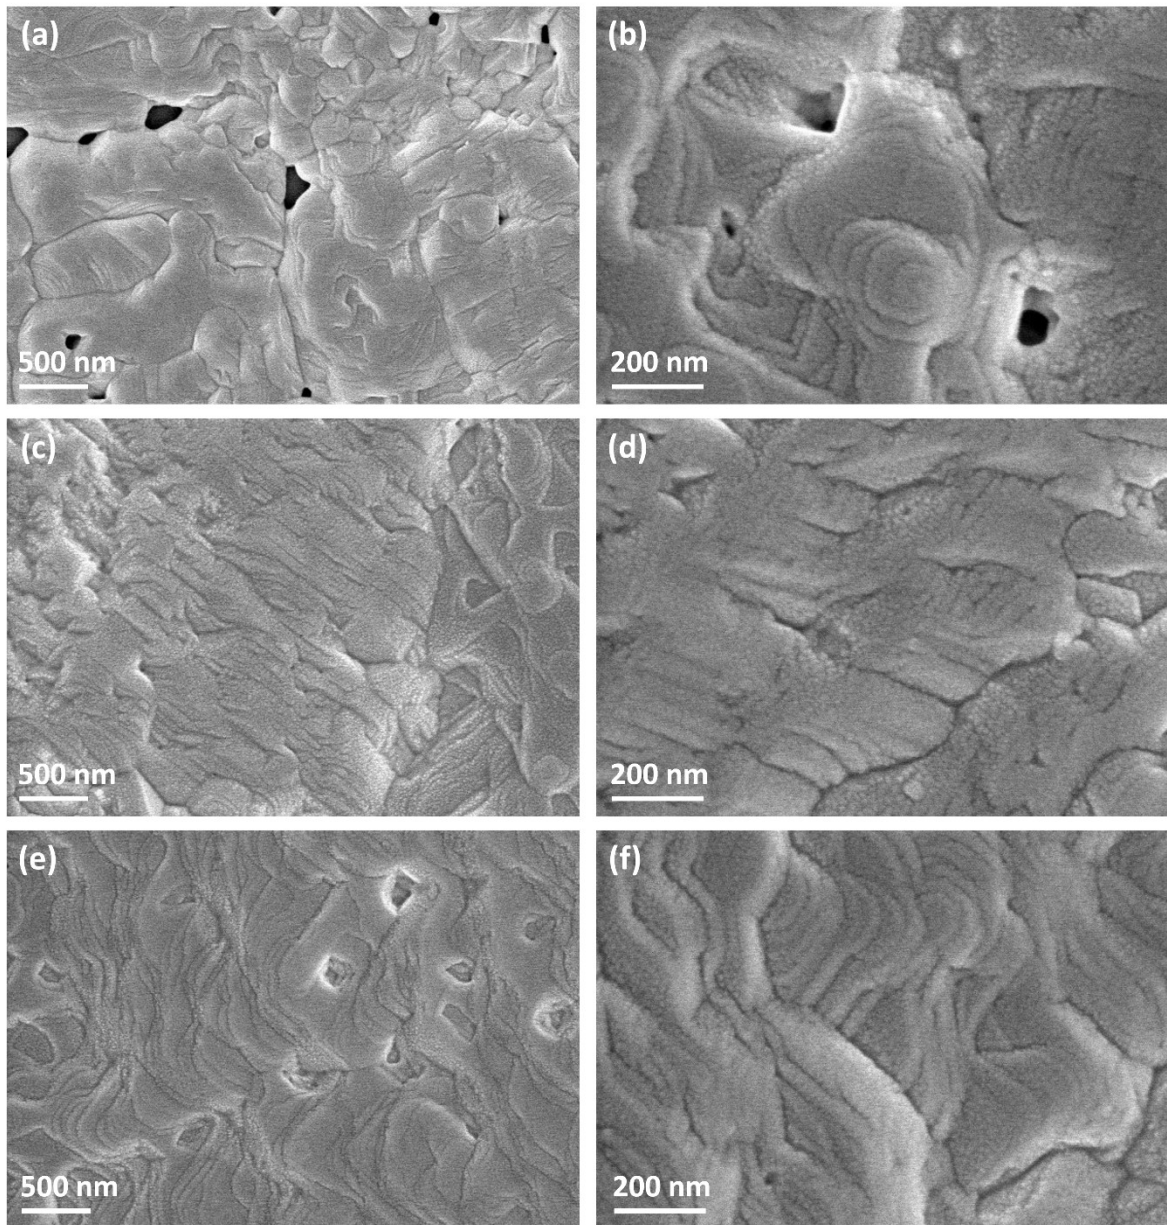

**Figure S12.** SEM images of (a-b) pure, (c-d) M2 V-doped MoS<sub>2</sub> and (e-f) W2 V-doped WS<sub>2</sub> suspended perovskite layer.

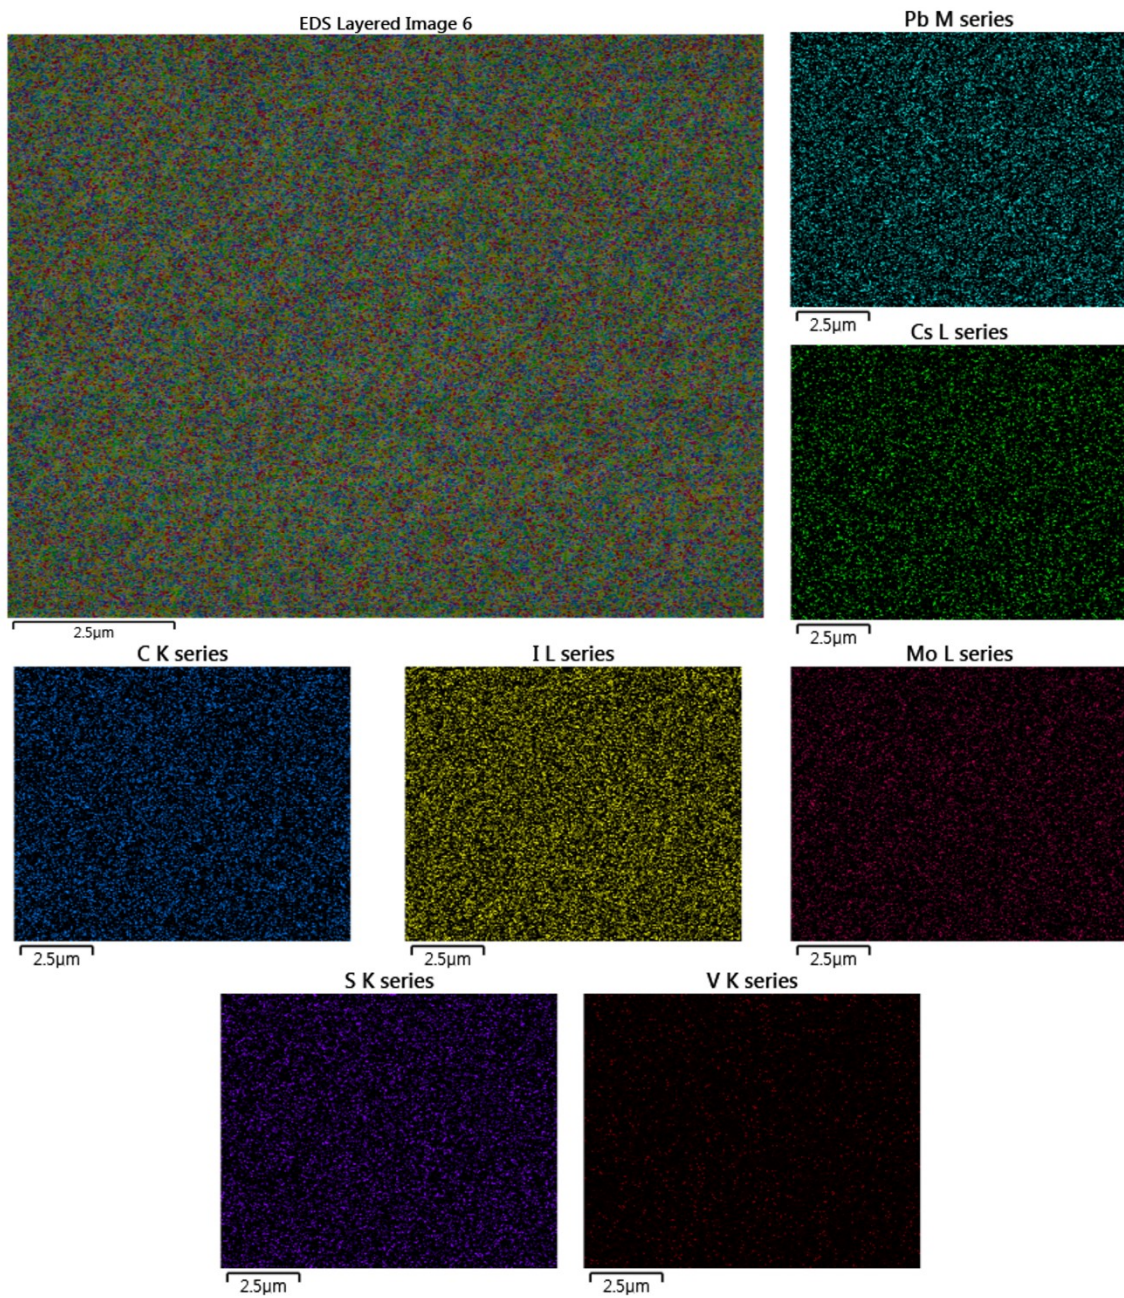

**Figure S13.** Elemental mapping images of M2 V-doped  $\text{MoS}_2$  suspended perovskite layer.

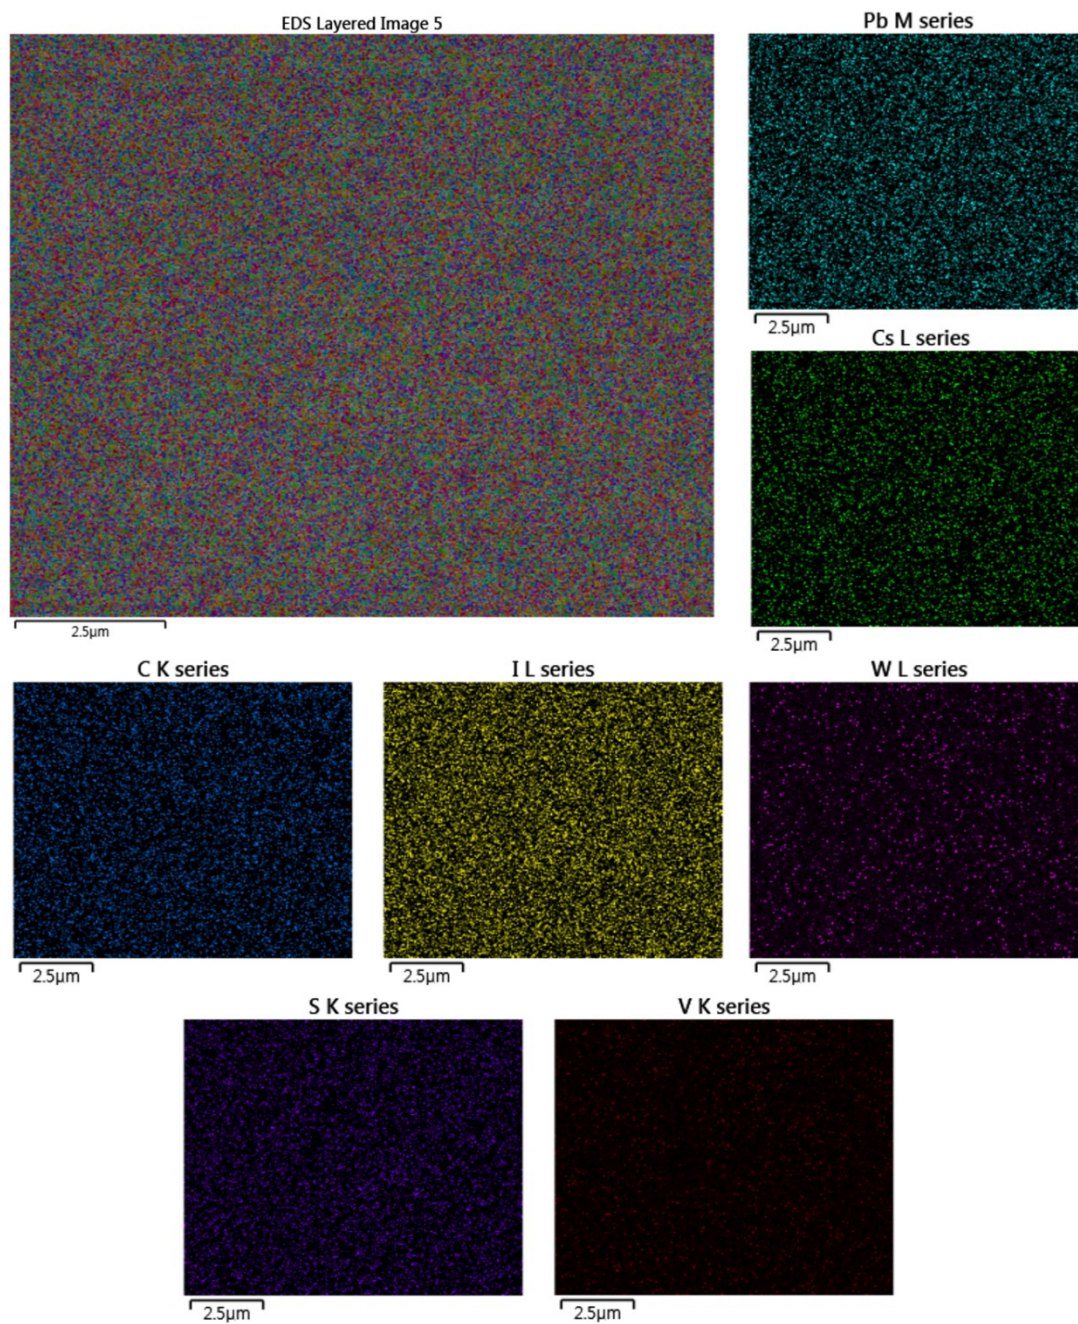

**Figure S14.** Elemental mapping images of W<sub>2</sub> V-doped WS<sub>2</sub> suspended perovskite layer.

**Table S1.** Photovoltaic characteristics of PSC devices using different thickness of EL, HL and pure perovskite AL.

| <b>Active layer</b> | <b>HTL thickness</b> | <b>ETL thickness</b> | <b>FF [%]</b> | <b>PCE [%]</b> |
|---------------------|----------------------|----------------------|---------------|----------------|
| 150 nm              | 40 nm                | 90 nm                | 48.1          | 7.53           |
| <b>205 nm</b>       | <b>40 nm</b>         | <b>90 nm</b>         | <b>55.4</b>   | <b>10.55</b>   |
| 245 nm              | 40 nm                | 90 nm                | 51.3          | 8.85           |
| 205 nm              | 20 nm                | 90 nm                | 53.6          | 9.09           |
| 205 nm              | 55 nm                | 90 nm                | 54.2          | 9.99           |
| 205 nm              | 40 nm                | 75 nm                | 53.2          | 9.25           |
| 205 nm              | 55 nm                | 115 nm               | 52.5          | 9.51           |

**Table S2.** Photovoltaic characteristics of PSC devices using different concentration of MoS<sub>2</sub> and WS<sub>2</sub> nanostructures blended perovskite layer

| <b>Doping element</b>  | <b>Amount of doping (vol.%)</b> | <b>V<sub>oc</sub> [V]</b> | <b>J<sub>sc</sub> [mA/cm<sup>2</sup>]</b> | <b>FF [%]</b> | <b>PCE [%]</b> | <b>R<sub>s</sub> [Ω·cm<sup>2</sup>]</b> |
|------------------------|---------------------------------|---------------------------|-------------------------------------------|---------------|----------------|-----------------------------------------|
| <b>MoS<sub>2</sub></b> | 5                               | 0.952                     | 20.14                                     | 58.76         | 11.26          | 179.46                                  |
|                        | 10                              | 0.964                     | 21.0                                      | 58.13         | 11.77          | 176.24                                  |
|                        | 15                              | 0.946                     | 22.11                                     | 58.58         | 12.25          | 173.18                                  |
|                        | 20                              | 0.967                     | 20.64                                     | 57.70         | 11.51          | 178.43                                  |
| <b>WS<sub>2</sub></b>  | 5                               | 0.961                     | 21.31                                     | 58.57         | 11.99          | 174.86                                  |
|                        | 10                              | 0.968                     | 21.73                                     | 57.81         | 12.16          | 169.32                                  |
|                        | 15                              | 0.968                     | 22.51                                     | 57.44         | 12.51          | 166.34                                  |
|                        | 20                              | 0.984                     | 21.51                                     | 57.15         | 12.09          | 171.76                                  |

**Table S3.** Photovoltaic characteristics of PSC devices using pure and different amount of V-doped XS<sub>2</sub> nanostructures blended perovskite layer

| <b>Active layer</b> | <b>V<sub>oc</sub><br/>[V]</b> | <b>J<sub>sc</sub><br/>[mA/cm<sup>2</sup>]</b> | <b>FF<br/>[%]</b> | <b>PCE<br/>[%]</b> | <b>R<sub>s</sub><br/>[Ω·cm<sup>2</sup>]</b> |
|---------------------|-------------------------------|-----------------------------------------------|-------------------|--------------------|---------------------------------------------|
| Pure Perovskite     | 0.945                         | 20.1                                          | 55.4              | 10.54              | 181.78                                      |
| Perovskite with M1  | 0.948                         | 24.37                                         | 59.33             | 13.70              | 167.18                                      |
| Perovskite with M2  | 0.975                         | 24.76                                         | 61.57             | 14.86              | 154.63                                      |
| Perovskite with M3  | 0.981                         | 24.54                                         | 60.68             | 14.60              | 156.31                                      |
| Perovskite with W1  | 0.971                         | 23.33                                         | 59.58             | 13.49              | 163.75                                      |
| Perovskite with W2  | 0.978                         | 25.48                                         | 62.68             | 15.62              | 149.87                                      |
| Perovskite with W2  | 0.989                         | 24.65                                         | 61.10             | 14.89              | 151.47                                      |

**Table S4.** Photovoltaic characteristics of PSC devices using different concentrations of M2 and W2 nanostructures blended perovskite layer

| <b>Doping element</b> | <b>Amount of doping (vol.%)</b> | <b>V<sub>oc</sub> [V]</b> | <b>J<sub>sc</sub> [mA/cm<sup>2</sup>]</b> | <b>FF [%]</b> | <b>PCE [%]</b> | <b>R<sub>s</sub> [<math>\Omega \cdot \text{cm}^2</math>]</b> |
|-----------------------|---------------------------------|---------------------------|-------------------------------------------|---------------|----------------|--------------------------------------------------------------|
| <b>M2</b>             | 5                               | 0.968                     | 22.56                                     | 60.15         | 13.13          | 165.34                                                       |
|                       | 10                              | 0.977                     | 23.15                                     | 60.23         | 13.62          | 157.62                                                       |
|                       | 15                              | 0.975                     | 24.76                                     | 61.57         | 14.86          | 154.63                                                       |
|                       | 20                              | 0.980                     | 23.73                                     | 59.92         | 13.93          | 161.65                                                       |
| <b>W2</b>             | 5                               | 0.961                     | 23.85                                     | 62.14         | 14.21          | 156.34                                                       |
|                       | 10                              | 0.979                     | 24.90                                     | 62.16         | 15.13          | 151.33                                                       |
|                       | 15                              | 0.978                     | 25.49                                     | 62.68         | 15.62          | 149.87                                                       |
|                       | 20                              | 0.974                     | 24.61                                     | 62.01         | 14.86          | 152.18                                                       |

**Table S5.** Various perovskite-based solar cell device performances

| Device structure                                                        | Jsc<br>(mA·cm <sup>-2</sup> ) | V <sub>oc</sub> (V) | FF (%)       | PCE<br>(%)   | Ref.             |
|-------------------------------------------------------------------------|-------------------------------|---------------------|--------------|--------------|------------------|
| <b>M2@Cs<sub>0.1</sub>MA<sub>0.9</sub>PbI<sub>3</sub></b>               | <b>24.76</b>                  | <b>0.975</b>        | <b>61.57</b> | <b>14.86</b> | <b>This work</b> |
| <b>W2@Cs<sub>0.1</sub>MA<sub>0.9</sub>PbI<sub>3</sub></b>               | <b>25.49</b>                  | <b>0.978</b>        | <b>62.68</b> | <b>15.62</b> |                  |
| CH <sub>3</sub> NH <sub>3</sub> PbI <sub>3</sub>                        | 17.97                         | 1.04                | 65.54        | 12.24        | 1                |
| MAPbI <sub>3-x</sub> Cl <sub>x</sub> /WS <sub>2</sub>                   | 15.91                         | 0.82                | 64           | 8.02         | 2                |
| MAPbI <sub>3-x</sub> Cl <sub>x</sub> /MoS <sub>2</sub>                  | 14.89                         | 0.96                | 0.67         | 9.53         |                  |
| CH <sub>3</sub> NH <sub>3</sub> PbI <sub>3-x</sub> Cl <sub>x</sub> /PEG | 19.53                         | 0.94                | 70.35        | 12.90        | 3                |
| CH <sub>3</sub> NH <sub>3</sub> PbI <sub>3</sub>                        | 18.84                         | 1.09                | 66.70        | 13.69        | 4                |
| WSe <sub>2</sub>                                                        | 21.82                         | 0.63                | 72           | 9.67         | 5                |
| FASnI <sub>3</sub> /WSe <sub>2</sub>                                    | 22.71                         | 0.63                | 73.2         | 10.47        |                  |
| CH <sub>3</sub> NH <sub>3</sub> PbI <sub>3</sub>                        | 19.75                         | 0.88                | 70.1         | 12.18        | 6                |
| CH <sub>3</sub> NH <sub>3</sub> PbI <sub>3</sub> /Urea                  | 22.97                         | 0.94                | 61.1         | 13.19        |                  |
| CH <sub>3</sub> NH <sub>3</sub> PbI <sub>3</sub>                        | 20.67                         | 1.00                | 75           | 15.54        | 7                |
| MAPbI <sub>3</sub>                                                      | 20.91                         | 0.96                | 75.20        | 15.27        | 8                |
| MAPbI <sub>3</sub> /MoS <sub>2</sub>                                    | 22.28                         | 1.02                | 77.91        | 17.63        |                  |
| MAPbI <sub>3</sub>                                                      | 18.75                         | 0.96                | 66           | 13.79        | 9                |
| MAPbI <sub>3</sub> /MoS <sub>2</sub>                                    | 20.9                          | 0.98                | 69           | 16.09        |                  |
| CH <sub>3</sub> NH <sub>3</sub> PbI <sub>3</sub>                        | 21.53                         | 1.08                | 70.47        | 16.45        | 10               |
| CH <sub>3</sub> NH <sub>3</sub> PbI <sub>3</sub>                        | 18.11                         | 0.927               | 73.1         | 12.3         | 11               |
| CH <sub>3</sub> NH <sub>3</sub> PbI <sub>3</sub> /GO                    | 20.71                         | 0.959               | 76.3         | 15.2         |                  |
| MAPbI <sub>3</sub> /SnS <sub>2</sub>                                    | 19.29                         | 0.68                | 61           | 13.04        | 12               |
| CH <sub>3</sub> NH <sub>3</sub> PbI <sub>3</sub> /MoTe <sub>2</sub>     | 21.387                        | 0.886               | 60           | 11.36        | 13               |

## References

1. E. M. Mkawi, S. M. H. Qaid, I. S. Roqan, Y. Al-Hadeethi, F. G. Almeahmadi, H. A. Alamoudi, F. Alreshidi, S. A. Alsulaiman, H. I. Jaafari, Y. Alajlani, A. Umar, E. Bekyarova and A. S. Aldwayyan, *Opt. Mater.*, 2024, **157**, 116089.
2. Y. G. Kim, K. C. Kwon, Q. Van Le, K. Hong, H. W. Jang and S. Y. Kim, *J. Power Sources*, 2016, **319**, 1–8.
3. C.-Y. Chang, C.-Y. Chu, Y.-C. Huang, C.-W. Huang, S.-Y. Chang, C.-A. Chen, C.-Y. Chao and W.-F. Su, *ACS Appl. Mater. Interfaces*, 2015, **7**, 4955–4961.
4. X. Jin, L. Yang and X.-F. Wang, *Nano-Micro Lett.*, 2021, **13**, 1–13.
5. T. Wang, F. Zheng, G. Tang, J. Cao, P. You, J. Zhao and F. Yan, *Adv. Sci.*, 2021, **8**, 2004315.
6. D. Thakur, J.-R. Wu, A. Chandel, K.-J. Cheng, S.-E. Chiang, K.-B. Cai, S.-H. Chen, C.-C. Yang, Y.-L. Zhong and C.-T. Yuan, *J. Alloy. Compd.*, 2021, **858**, 157660.
7. Z. Guo, L. Gao, Z. Xu, S. Teo, C. Zhang, Y. Kamata, S. Hayase and T. Ma, *Small*, 2018, **14**, 1802738.
8. Z. Liu, K. Liu, F. Zhang, S. M. Jain, T. He, Y. Jiang, P. Liu, J. Yang, H. Liu and M. Yuan, *Solar Energy*, 2020, **195**, 436–445.
9. K. Mahmood, A. Khalid, S. W. Ahmad, H. G. Qutab, M. Hameed and R. Sharif, *Solar Energy*, 2020, **203**, 32–36.
10. Y. Zhao, X. Zhang, X. Han, C. Hou, H. Wang, J. Qi, Y. Li and Q. Zhang, *Chem. Eng. J.*, 2021, **417**, 127912.
11. C.-C. Chung, S. Narra, E. Jokar, H.-P. Wu and E. W.-G. Diau, *J. Mater. Chem. A*, 2017, **5**, 13957–13965.
12. E. Zhao, L. Gao, S. Yang, L. Wang, J. Cao and T. Ma, *Nano Res.*, 2018, **11**, 5913–5923.
13. D. Vikraman, H. Liu, S. Hussain, S. H. A. Jaffery, K. Karuppasamy, E. B. Jo, Z. Abbas, J. Jung, J. Kang and H. S. Kim, *Small*, 2022, **18**, 2104216.
